# Supplementary material for: El Niño Enhances Snowline Rise and Ice Loss on the World's Largest Tropical Ice Cap
Source: Copernicus journal article supplement (doi:10.5194/egusphere-2024-676), 2024-03-18
Supplement: Supplementary file 1 [file egusphere-2024-676-supplement.pdf]

## Supplementary Information

### El Niño Enhances Snowline Rise and Ice Loss on the World's Largest Tropical Ice Cap

Kara A. Lamantia<sup>1,2</sup>, Laura J. Larocca<sup>3</sup>, Lonnie G. Thompson<sup>1,2</sup>, Bryan Mark<sup>2,4</sup>

<sup>1</sup> Byrd Polar and Climate Research Center, Ohio State University, Columbus, OH, USA

<sup>2</sup> School of Earth Sciences, Ohio State University, Columbus, OH, USA

<sup>3</sup> School of Ocean Futures, Arizona State University, Tempe, AZ, USA

<sup>4</sup> Department of Geography, Ohio State University, Columbus, OH, USA

*Correspondence to:* Kara Lamantia ([lamantia.31@osu.edu](mailto:lamantia.31@osu.edu))

### Contents

#### *Tables*

**Table S1:** Detailed satellite image and DEM usage information

**Table S2:** All annual result calculations

**Table S3:** Regression analysis results with and without El Niño events

**Table S4:** QIC result variables correlation values

**Table S5:** Analysis variance with post ad hoc testing between El Niño, La Niña, and neutral events

**Table S6:** All ENSO index correlation values

#### *Figures*

**Figure S1:** Method flowchart for imagery analysis

**Figure S2:** Sample NIR histogram with OTSU threshold

**Figure S3:** Sample ELA Calculation

**Figure S4:** Box and whisker plot results of mean analysis variance

**Figure S5:** Projected decline of total QIC area

| Satellite  | Date       | Image Information                                                  | Cloud Cover % | DEM Used           |
|------------|------------|--------------------------------------------------------------------|---------------|--------------------|
| Landsat 5  | 7/25/1985  | LANDSAT/LT05/C02/T1_TOA/LT05_003070_19850725                       | 2             | NASA SRTM DEM      |
| Landsat 5  | 7/12/1986  | LANDSAT/LT05/C02/T1_TOA/LT05_003070_19860712                       | 0             |                    |
| Landsat 5  | 9/3/1988   | LANDSAT/LT05/C02/T1_TOA/LT05_003070_19880903                       | 13            |                    |
| Landsat 5  | 9/22/1989  | LANDSAT/LT05/C02/T1_TOA/LT05_003070_19890922                       | 5             |                    |
| Landsat 5  | 8/8/1990   | LANDSAT/LT05/C02/T1_TOA/LT05_003070_19900909                       | 11            |                    |
| Landsat 5  | 7/26/1991  | LANDSAT/LT05/C02/T1_TOA/LT05_003070_19910726                       | 1             |                    |
| Landsat 5  | 9/14/1992  | LANDSAT/LT05/C02/T1_TOA/LT05_003070_19920914                       | 4             |                    |
| Landsat 5  | 6/29/1993  | LANDSAT/LT05/C02/T1_TOA/LT05_003070_19930901                       | 11            |                    |
| Landsat 5  | 9/7/1995   | LANDSAT/LT05/C02/T1_TOA/LT05_003070_19950907                       | 1             |                    |
| Landsat 5  | 9/9/1996   | LANDSAT/LT05/C02/T1_TOA/LT05_003070_19960909                       | 6             |                    |
| Landsat 5  | 8/27/1997  | LANDSAT/LT05/C02/T1_TOA/LT05_003070_19970827                       | 9             |                    |
| Landsat 5  | 9/15/1998  | LANDSAT/LT05/C02/T1_TOA/LT05_003070_19980915                       | 8             |                    |
| Landsat 5  | 8/1/1999   | LANDSAT/LT05/C02/T1_TOA/LT05_003070_19990801                       | 3             |                    |
| Landsat 5  | 8/3/2000   | LANDSAT/LT05/C02/T1_TOA/LT05_003070_20000803                       | 12            |                    |
| Landsat 5  | 8/6/2001   | LANDSAT/LT05/C02/T1_TOA/LT05_003070_20010806                       | 1             |                    |
| Landsat 5  | 9/29/2003  | LANDSAT/LT05/C02/T1_TOA/LT05_003070_20030929                       | 11            |                    |
| Landsat 5  | 7/13/2004  | LANDSAT/LT05/C02/T1_TOA/LT05_003070_20040713                       | 2             |                    |
| Landsat 5  | 8/17/2005  | LANDSAT/LT05/C02/T1_TOA/LT05_003070_20050817                       | 1             |                    |
| Landsat 5  | 9/5/2006   | LANDSAT/LT05/C02/T1_TOA/LT05_003070_20060905                       | 4             | Copernicus DEM 30m |
| Landsat 5  | 8/7/2007   | LANDSAT/LT05/C02/T1_TOA/LT05_003070_20070807                       | 1             |                    |
| Landsat 5  | 8/25/2008  | LANDSAT/LT05/C02/T1_TOA/LT05_003070_20080825                       | 0             |                    |
| Landsat 5  | 8/28/2009  | LANDSAT/LT05/C02/T1_TOA/LT05_003070_20090828                       | 1             |                    |
| Landsat 5  | 9/16/2010  | LANDSAT/LT05/C02/T1_TOA/LT05_003070_20100916                       | 0             |                    |
| Landsat 5  | 9/3/2011   | LANDSAT/LT05/C02/T1_TOA/LT05_003070_20110903                       | 1             |                    |
| Landsat 8  | 9/8/2013   | LANDSAT/LC08/C01/T1_SR/LC08_003070_20130908                        | 6.5           |                    |
| Landsat 8  | 8/26/2014  | LANDSAT/LC08/C01/T1_SR/LC08_003070_20140826                        | 13.0          |                    |
| Landsat 8  | 9/14/2015  | LANDSAT/LC08/C01/T1_SR/LC08_003070_20150914                        | 9.1           |                    |
| Landsat 8  | 9/16/2016  | LANDSAT/LC08/C01/T1_SR/LC08_003070_20160916                        | 23.0          |                    |
| Landsat 8  | 10/5/2017  | LANDSAT/LC08/C01/T1_SR/LC08_003070_20171005                        | 2.2           |                    |
| Landsat 8  | 7/4/2018   | LANDSAT/LC08/C01/T1_SR/LC08_003070_20180704                        | 2.0           |                    |
| Landsat 8  | 9/25/2019  | LANDSAT/LC08/C01/T1_SR/LC08_003070_20190925                        | 7.6           |                    |
| Landsat 8  | 8/26/2020  | LANDSAT/LC08/C01/T1_SR/LC08_003070_20200826                        | 3.7           |                    |
| Landsat 8  | 8/13/2021  | LANDSAT/LC08/C01/T1_SR/LC08_003070_20210813                        | 3.7           |                    |
| Landsat 9  | 9/9/2022   | LANDSAT/LC09/C02/T1_TOA/LC09_003070_20220824                       | 1.4           |                    |
| Sentinel-2 | 10/11/2023 | COPERNICUS/S2_SR_HARMONIZED/20231011T145729_20230926T150056_T19LBE | 3.1           |                    |

Table S1: Imagery Collection Details and DEM usage information.

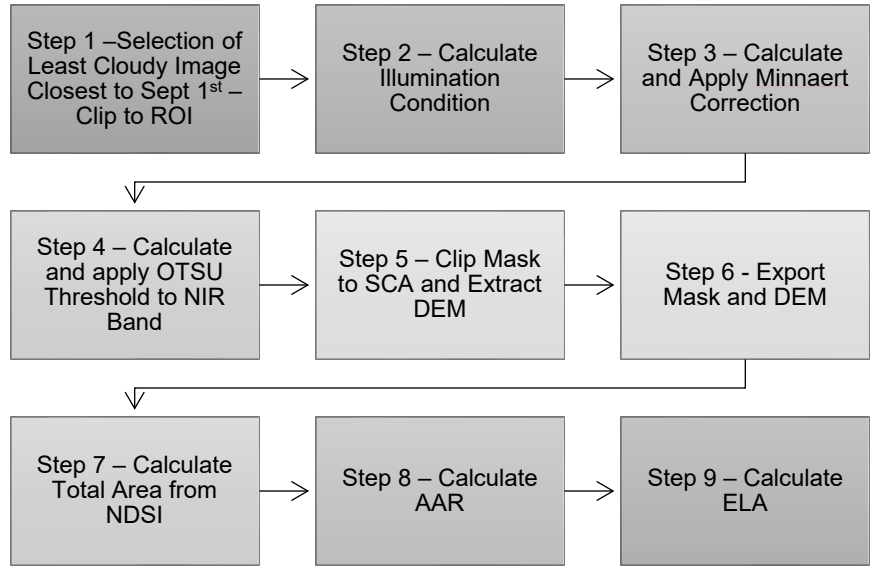

Figure S1: Flowchart depicting pre-processing and processing steps to calculate and export a full detail of variables from the end of the dry season on the QIC.

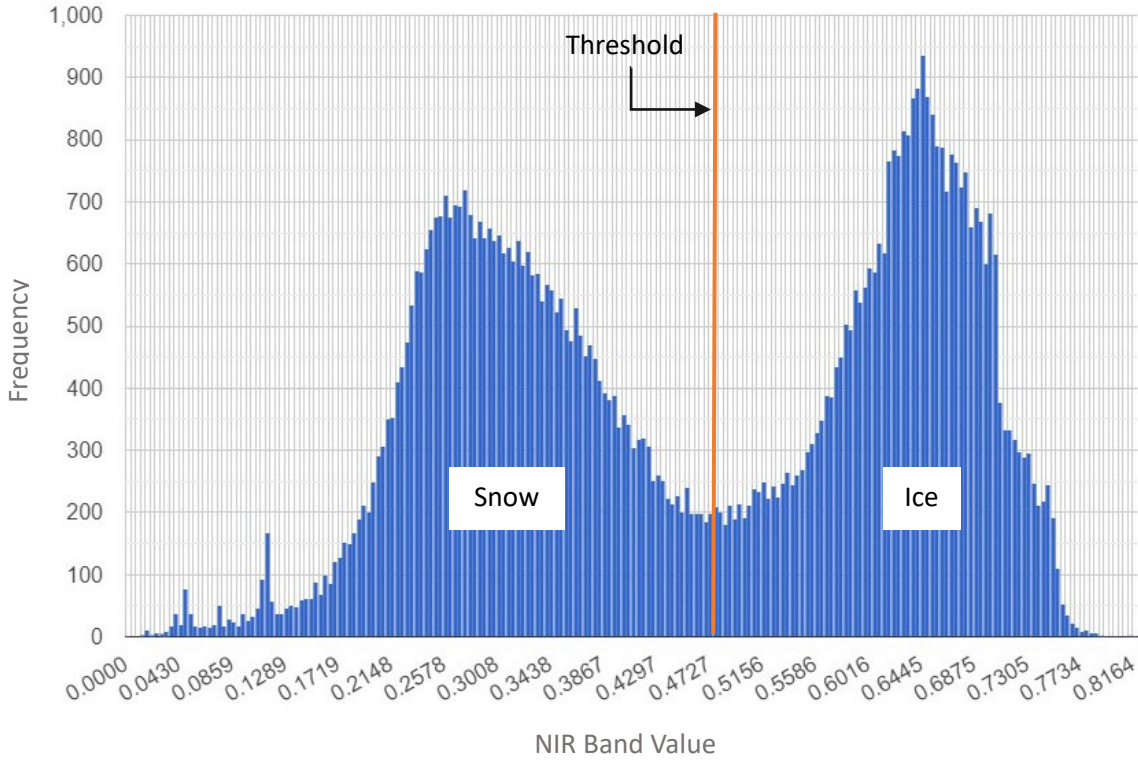

Figure S2: Sample NIR band histogram from 2015 to display the bimodal distribution of snow versus ice reflectance, used for calculating the OTSU threshold. The threshold is displayed in orange (0.478).

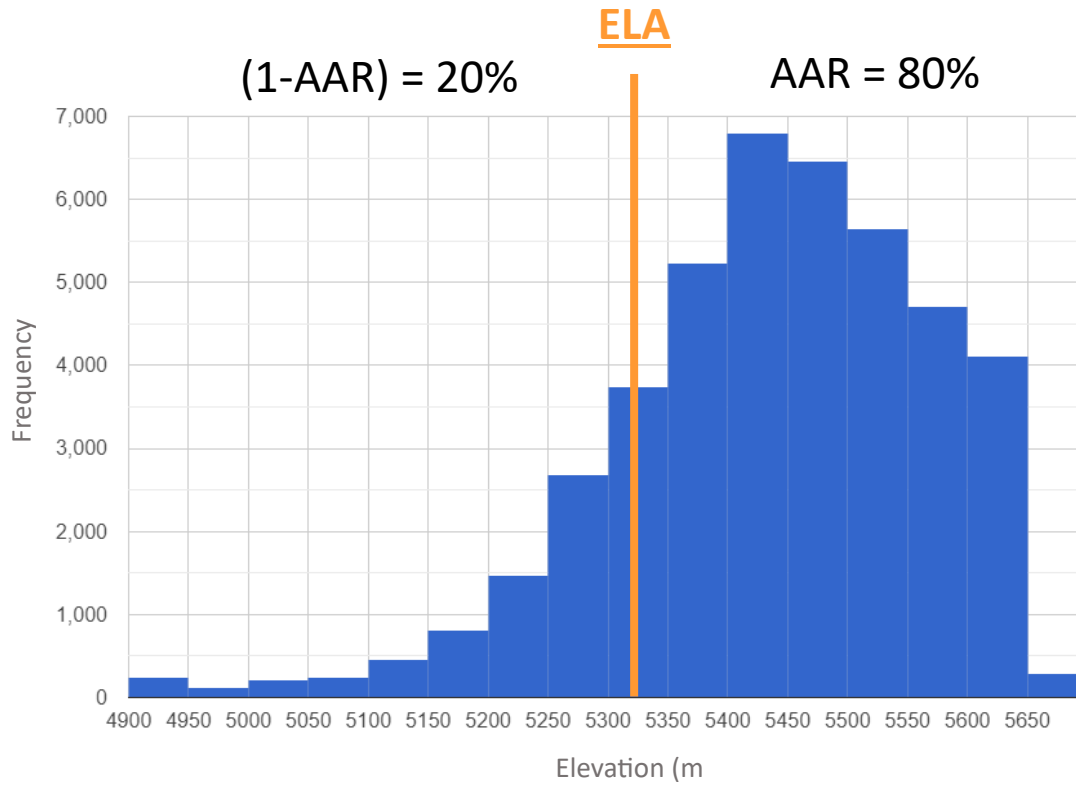

Figure S3: Sample ELA calculation using the DEM from the total area with an AAR of 0.8 (80%). The DEM is backfilled using 1-AAR to find the ELA.

| Imagery Date | Total Area (km <sup>2</sup> ) | SCA (km <sup>2</sup> ) | AAR  | Med Elev (m) | ELA (m) |
|--------------|-------------------------------|------------------------|------|--------------|---------|
| 7/25/1985    | 59.57                         | 46.79                  | 0.79 | 5421.47      | 5249.45 |
| 7/12/1986    | 59.30                         | 46.99                  | 0.79 | 5421.47      | 5245.53 |
| 9/3/1988     | 53.07                         | 37.41                  | 0.70 | 5457.50      | 5317.47 |
| 9/22/1989    | 55.41                         | 44.68                  | 0.81 | 5433.46      | 5257.53 |
| 8/8/1990     | 54.30                         | 38.72                  | 0.71 | 5453.40      | 5309.50 |
| 7/26/1991    | 53.46                         | 37.27                  | 0.70 | 5457.50      | 5317.46 |
| 9/14/1992    | 51.73                         | 36.39                  | 0.70 | 5461.52      | 5325.51 |
| 6/29/1993    | 54.98                         | 42.13                  | 0.77 | 5437.46      | 5281.56 |
| 9/7/1995     | 51.00                         | 32.65                  | 0.64 | 5477.45      | 5361.45 |
| 9/9/1996     | 51.08                         | 36.68                  | 0.72 | 5461.54      | 5321.63 |
| 8/27/1997    | 51.04                         | 38.26                  | 0.75 | 5457.50      | 5309.51 |
| 9/15/1998    | 47.62                         | 14.25                  | 0.30 | 5541.60      | 5497.46 |
| 8/1/1999     | 52.14                         | 40.22                  | 0.77 | 5441.51      | 5285.48 |
| 8/3/2000     | 48.81                         | 36.89                  | 0.76 | 5457.49      | 5317.45 |
| 8/6/2001     | 52.34                         | 42.70                  | 0.82 | 5437.47      | 5273.49 |
| 9/29/2003    | 47.94                         | 38.07                  | 0.79 | 5457.49      | 5305.47 |
| 7/13/2004    | 53.33                         | 41.29                  | 0.77 | 5441.50      | 5277.60 |
| 8/17/2005    | 45.77                         | 25.96                  | 0.57 | 5505.64      | 5413.51 |
| 9/5/2006     | 45.03                         | 31.87                  | 0.71 | 5481.51      | 5365.49 |
| 8/7/2007     | 45.34                         | 32.11                  | 0.71 | 5481.50      | 5361.46 |
| 8/25/2008    | 45.02                         | 31.87                  | 0.71 | 5481.52      | 5365.48 |
| 8/28/2009    | 44.24                         | 29.16                  | 0.66 | 5489.53      | 5385.58 |
| 9/16/2010    | 43.08                         | 26.51                  | 0.62 | 5501.53      | 5405.47 |
| 9/3/2011     | 45.05                         | 36.55                  | 0.81 | 5461.54      | 5317.45 |
| 9/8/2013     | 44.93                         | 38.32                  | 0.85 | 5458.08      | 5286.10 |
| 8/26/2014    | 44.48                         | 36.49                  | 0.82 | 5465.98      | 5318.04 |
| 9/14/2015    | 42.85                         | 33.36                  | 0.78 | 5470.03      | 5346.04 |
| 9/16/2016    | 40.65                         | 20.58                  | 0.51 | 5522.02      | 5454.08 |
| 9/3/2017     | 39.96                         | 29.15                  | 0.73 | 5490.04      | 5386.07 |
| 7/4/2018     | 45.48                         | 34.62                  | 0.76 | 5470.05      | 5334.01 |
| 9/25/2019    | 40.12                         | 29.50                  | 0.74 | 5490.03      | 5381.97 |
| 8/26/2020    | 40.36                         | 30.54                  | 0.76 | 5490.03      | 5373.99 |
| 8/13/2021    | 41.58                         | 32.05                  | 0.77 | 5482.01      | 5353.85 |
| 9/9/2022     | 39.64                         | 25.35                  | 0.64 | 5505.98      | 5418.01 |
| 10/11/2023   | 36.44                         | 19.04                  | 0.52 | 5533.97      | 5449.99 |

Table S2: All result calculated for the end of the dry season total area, SCA, AAR, median elevation of the SCA, and the ELA.

|                                | SCA    | SCA<br>(no El Niño) | ELA     | ELA<br>(no El Niño) |
|--------------------------------|--------|---------------------|---------|---------------------|
| <b>R-squared</b>               | 0.35   | 0.50                | 0.31    | 0.42                |
| <b>Intercept</b>               | 817.55 | 752.98              | -592.72 | -121.83             |
| <b>Coefficient<br/>(slope)</b> | -0.39  | -0.36               | 2.96    | 2.72                |
| <b>Standard<br/>deviation</b>  | 0.09   | 0.06                | 0.75    | 0.59                |
| <b>p-value</b>                 | <0.001 | <0.001              | <0.001  | <0.001              |

Table S3: Results of SCA and ELA regression analysis, with and without El Niño years (1998 & 2016).

|            | Med Elev | SCA    | AAR    | Total Area | ELA    |
|------------|----------|--------|--------|------------|--------|
| Med Elev   | 1.000    | -0.996 | -0.809 | -0.798     | 0.980  |
| SCA        | -0.996   | 1.000  | 0.835  | 0.772      | -0.980 |
| AAR        | -0.809   | 0.835  | 1.000  | 0.302      | -0.849 |
| Total Area | -0.798   | 0.772  | 0.302  | 1.000      | -0.747 |

Table S4: Pearson correlation coefficients (r) showing QIC variable relationships. All values shown are statistically significant ( $p < 0.05$ ).

|                   | Group 1 | Group 2 | Mean Difference | p-value      | Reject      |
|-------------------|---------|---------|-----------------|--------------|-------------|
| <b>SCA</b>        | El Niño | La Niña | 6.816           | 0.138        | FALSE       |
|                   | El Niño | Neutral | 7.749           | <b>0.024</b> | <b>TRUE</b> |
|                   | La Niña | Neutral | 0.932           | 0.95         | FALSE       |
| <b>ELA</b>        | El Niño | La Niña | -55.734         | 0.131        | FALSE       |
|                   | El Niño | Neutral | -61.404         | <b>0.027</b> | <b>TRUE</b> |
|                   | La Niña | Neutral | -5.670          | 0.971        | FALSE       |
| <b>AAR</b>        | El Niño | La Niña | 0.143           | <b>0.011</b> | <b>TRUE</b> |
|                   | El Niño | Neutral | 0.137           | <b>0.002</b> | <b>TRUE</b> |
|                   | La Niña | Neutral | -0.006          | 0.989        | FALSE       |
| <b>Total Area</b> | El Niño | La Niña | 0.488           | 0.986        | FALSE       |
|                   | El Niño | Neutral | 2.240           | 0.628        | FALSE       |
|                   | La Niña | Neutral | 1.752           | 0.786        | FALSE       |

Table S5: Analysis variance with post hoc testing results. Significant p-values are recorded in bold italic.

| <u>Preceding Month</u> | <u>MVI</u>   |               |                 | <u>SOI</u>    |               |                 | <u>ONI</u>   |               |                 |
|------------------------|--------------|---------------|-----------------|---------------|---------------|-----------------|--------------|---------------|-----------------|
| -                      | <i>ELA</i>   | <i>SCA</i>    | <i>Med Elev</i> | <i>ELA</i>    | <i>SCA</i>    | <i>Med Elev</i> | <i>ELA</i>   | <i>SCA</i>    | <i>Med Elev</i> |
| <b>September</b>       | <i>0.451</i> | <i>-0.519</i> | <i>0.522</i>    | <i>-0.345</i> | <i>0.422</i>  | <i>-0.425</i>   | <i>0.608</i> | <i>-0.641</i> | <i>0.644</i>    |
| <b>October</b>         | <i>0.382</i> | <i>-0.437</i> | <i>0.440</i>    | -0.33         | <i>0.383</i>  | <i>-0.386</i>   | <i>0.555</i> | <i>-0.614</i> | <i>0.616</i>    |
| <b>November</b>        | <i>0.397</i> | <i>-0.454</i> | <i>0.46</i>     | <i>-0.476</i> | <i>-0.513</i> | <i>-0.527</i>   | <i>0.551</i> | <i>-0.609</i> | <i>0.612</i>    |
| <b>December</b>        | <i>0.443</i> | <i>-0.509</i> | <i>0.512</i>    | <i>-0.306</i> | <i>0.375</i>  | <i>-0.396</i>   | <i>0.549</i> | <i>-0.607</i> | <i>0.611</i>    |
| <b>January</b>         | <i>0.478</i> | <i>-0.537</i> | <i>0.535</i>    | <i>-0.462</i> | <i>0.482</i>  | <i>-0.466</i>   | <i>0.547</i> | <i>-0.599</i> | <i>0.602</i>    |
| <b>February</b>        | <i>0.545</i> | <i>-0.602</i> | <i>0.600</i>    | <i>-0.454</i> | <i>0.488</i>  | <i>-0.479</i>   | <i>0.548</i> | <i>-0.593</i> | <i>0.596</i>    |
| <b>March</b>           | <i>0.513</i> | <i>-0.573</i> | <i>0.578</i>    | <i>-0.381</i> | <i>0.426</i>  | <i>-0.437</i>   | <i>0.517</i> | <i>-0.555</i> | <i>0.562</i>    |
| <b>April</b>           | <i>0.509</i> | <i>-0.558</i> | <i>0.536</i>    | <i>-0.396</i> | <i>0.396</i>  | <i>-0.402</i>   | <i>0.441</i> | <i>-0.475</i> | <i>0.489</i>    |
| <b>May</b>             | <i>0.424</i> | <i>-0.456</i> | <i>0.468</i>    | -0.084        | 0.093         | -0.121          | 0.271        | -0.288        | 0.311           |
| <b>June</b>            | 0.067        | -0.061        | 0.084           | 0.319         | -0.297        | 0.282           | 0.012        | -0.005        | 0.034           |
| <b>July</b>            | -0.197       | 0.225         | -0.199          | 0.29          | -0.308        | 0.294           | -0.148       | -0.176        | -0.142          |
| <b>August</b>          | -0.262       | 0.311         | -0.287          | 0.305         | <i>-0.338</i> | 0.311           | -0.213       | 0.245         | -0.211          |

Table S6: Pearson correlation coefficient (r) values for the equilibrium line altitude (ELA), snow cover area (SCA), and median elevation (med elev) in relation to ENSO indices, including: the Multivariate ENSO Index (MEI), the Ocean Niño Index (ONI), and the Southern Oscillation Index (SOI). Statistically significant p-values (<0.05) are marked in italics and underlined.

a)

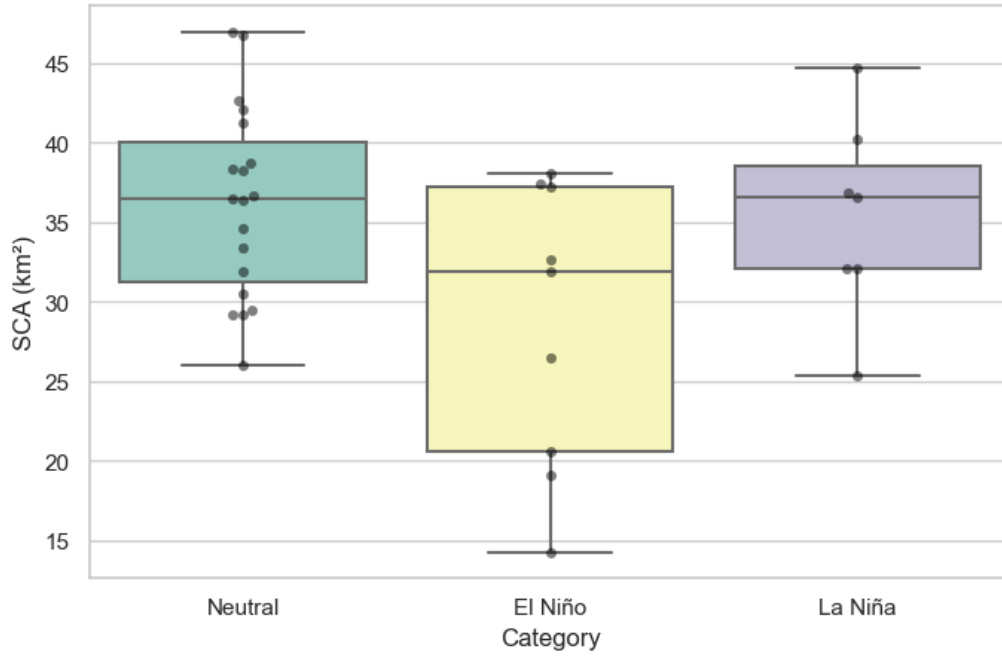

b)

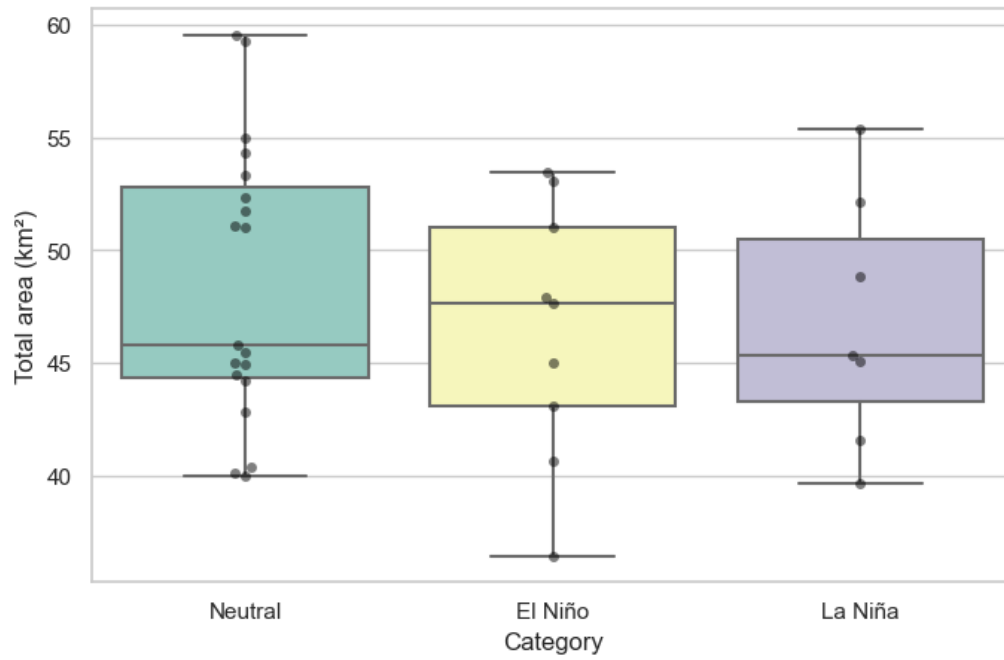



c)

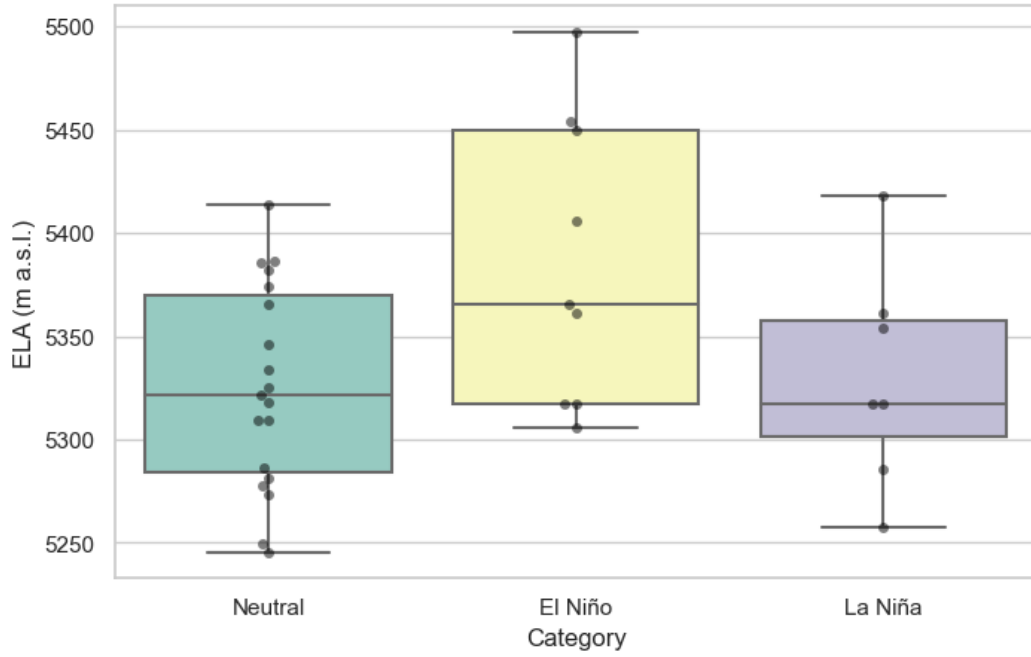

d)

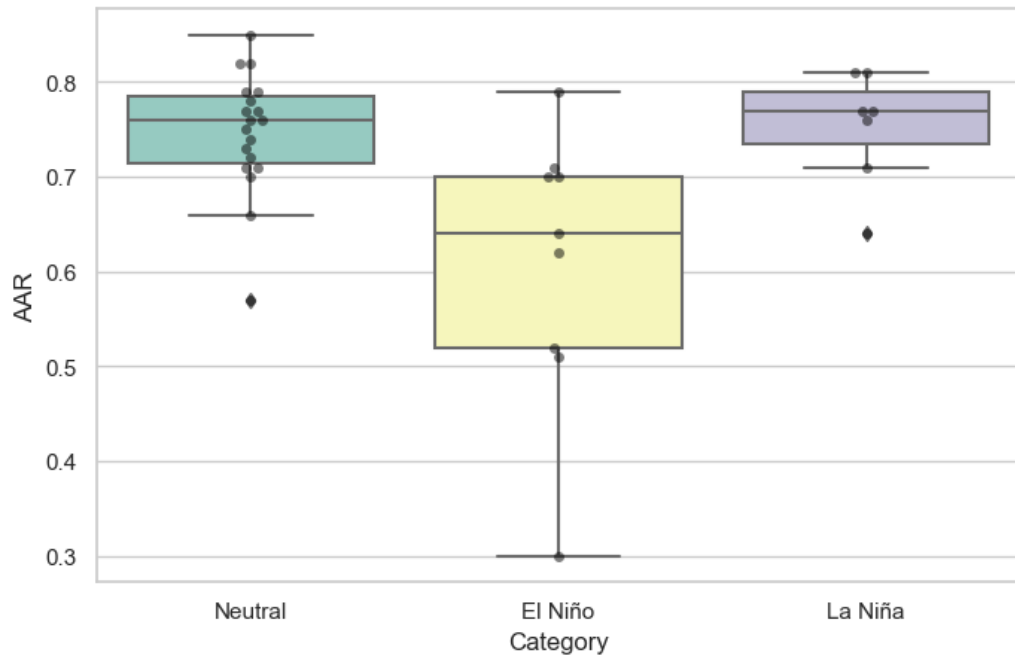

Figure S4: Box and whisker plots displaying differing means in the a) SCA, b) TA, c) ELA, and d) AAR from El Niño, La Niña, and neutral events.

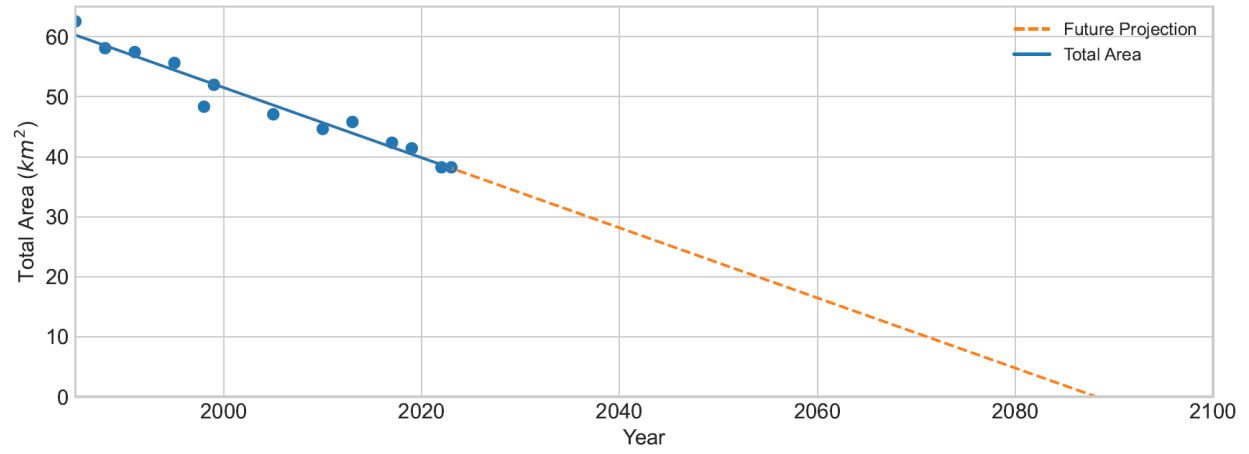

Figure S5: Projected disappearance of the entire QIC on the condition that it continues to follow the linear decline as recorded by the last 40 years.
